# Supplementary material for: In Vivo Targeting of Clostridioides difficile Using Phage-Delivered CRISPR-Cas3 Antimicrobials
Source: PubMed Central journal article supplement (PMC7064742; doi:10.1128/mbio.00019-20), 2020-03-10

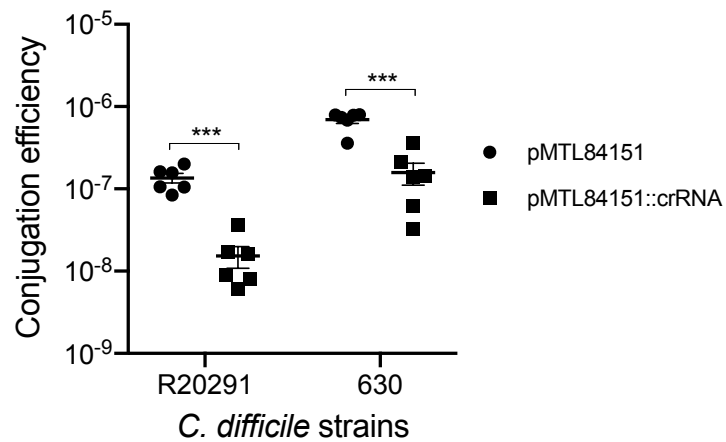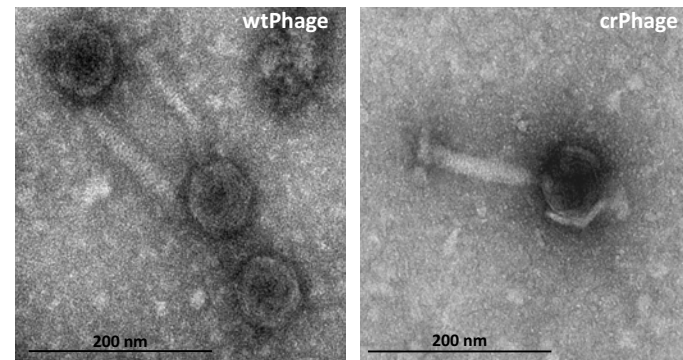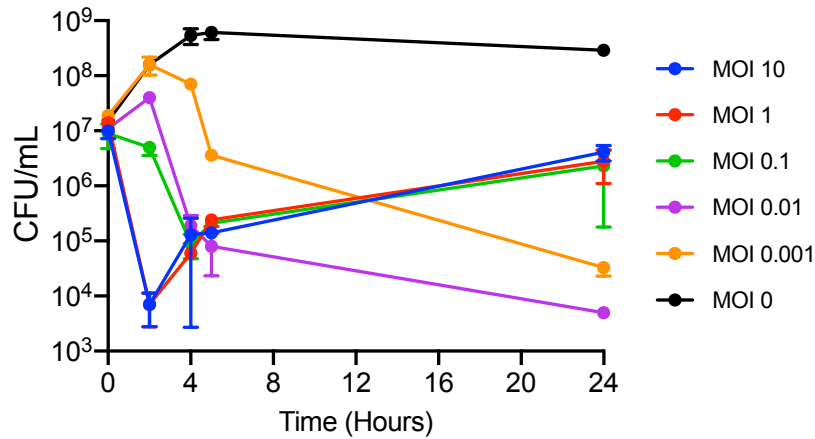

Supplement: mBio.00019-20-sf001.pdf [file mBio.00019-20-sf001.pdf]
